# Supplementary material for: Docking and Molecular Dynamics Study to Identify Novel Phytobiologics from Dracaena trifasciata against Metabolic Reprogramming in Rheumatoid Arthritis
Source: MDPI journal article supplement (doi:10.3390/life12081148), 2022-07-29
Supplement: s1 [file s1]

# 1. Hydrogen Bond Interactions of Lead Compounds for HK2

| Compound | Residue | Amino Acid | Distance |      | Donor Angle | Donor atom | Acceptor atom |
|----------|---------|------------|----------|------|-------------|------------|---------------|
|          |         |            | H-A      | D-A  |             |            |               |
| 11MS     | 69A     | ARG        | 1.94     | 2.92 | 160.16      | 521 [Ng+]  | 8141 [O2]     |
|          | 69A     | ARG        | 3.31     | 3.97 | 124.05      | 527 [Ng+]  | 8141 [O2]     |
| 22MS     | 67A     | PHE        | 3.06     | 3.39 | 101.39      | 8135 [Nar] | 497 [O2]      |
|          | 69A     | ARG        | 2.16     | 3.12 | 156.27      | 527 [Ng+]  | 8132 [O3]     |
|          | 69A     | ARG        | 2.13     | 3.11 | 159.97      | 521 [Ng+]  | 8135 [Nar]    |
|          | 161A    | THR        | 2.03     | 2.96 | 159.25      | 8144 [O3]  | 1334 [O2]     |
|          | 163A    | LEU        | 1.87     | 2.85 | 160.35      | 1352[Nam]  | 8147 [Nar]    |
|          | 164A    | ASP        | 3.20     | 3.68 | 113.29      | 1368 [O3]  | 8148 [Nar]    |
|          |         |            |          |      |             |            |               |
| 25ES     | 69A     | ARG        | 1.96     | 2.82 | 139.53      | 513 [Nam]  | 8158 [O3]     |
|          | 70A     | SER        | 2.36     | 2.88 | 110.15      | 530 [Nam]  | 8158 [O3]     |
|          | 70A     | SER        | 3.21     | 3.87 | 126.02      | 8158 [O3]  | 534 [O2]      |
|          | 70A     | SER        | 2.47     | 2.87 | 105.27      | 536 [O3]   | 8144 [O2]     |
|          | 462A    | ARG        | 2.94     | 3.66 | 128.37      | 4159[Ng+]  | 8156 [O3]     |
|          | 466A    | GLN        | 2.35     | 3.16 | 135.93      | 4201[Nam]  | 8156 [O3]     |
|          | 466A    | GLN        | 2.19     | 3.04 | 144.88      | 8156 [O3]  | 4200 [O2]     |
| 26ES     | 462A    | ARG        | 2.01     | 3.01 | 165.78      | 4165[Ng+]  | 8154 [O2]     |
|          | 462A    | ARG        | 2.86     | 3.67 | 136.24      | 4159[Ng+]  | 8154 [O2]     |
|          | 466A    | GLN        | 2.99     | 3.99 | 167.68      | 4201[Nam]  | 8132 [O3]     |
|          | 815A    | ASP        | 2.06     | 2.87 | 139.63      | 8156 [O3]  | 7259 [O2]     |
|          |         |            |          |      |             |            |               |
| 26MS     | 467A    | HIS        | 3.36     | 3.98 | 120.51      | 4204[Nam]  | 8150 [O2]     |
|          | 814A    | ASP        | 2.03     | 2.97 | 160.44      | 8153[O3]   | 7250[O2]      |
|          | 814A    | ASP        | 1.72     | 2.54 | 137.58      | 8155[O3]   | 7250[O2]      |
| 28MS     | 67A     | PHE        | 2.11     | 2.61 | 108.39      | 8142[Nam]  | 497[O2]       |
|          | 69A     | ARG        | 2.15     | 2.80 | 119.45      | 521 [Ng+]  | 8131[O2]      |
|          | 69A     | ARG        | 2.69     | 3.23 | 113.10      | 527 [Ng+]  | 8131[O2]      |
|          | 69A     | ARG        | 2.64     | 3.41 | 131.61      | 513 [Nam]  | 8142 [Nam]    |
| 30ES     | 69A     | ARG        | 3.22     | 3.99 | 133.15      | 513[Nam]   | 8141[O2]      |
|          | 456A    | VAL        | 2.58     | 3.28 | 128.17      | 8153 [O3]  | 4104 [O2]     |

## 2. Hydrogen Bond Interactions of Lead Compounds for GLS1

| Compound | Residue | Amino Acid | Distance (Å) |      | Donor Angle | Donor atom | Acceptor atom |
|----------|---------|------------|--------------|------|-------------|------------|---------------|
|          |         |            | H-A          | D-A  |             |            |               |
| 11MS     | 320A    | LYS        | 1.84         | 2.86 | 173.23      | 963 [Nam]  | 2925 [O2]     |
|          | 320A    | LYS        | 2.25         | 3.22 | 157.68      | 972 [N3+]  | 2944 [O2]     |
|          | 330A    | HIS        | 2.06         | 2.52 | 104.87      | 1072 [Npl] | 2935 [O2]     |
|          | 336A    | ALA        | 2.45         | 3.44 | 163.25      | 1124[Nam]  | 2941 [O3]     |
| 22MS     | 318A    | PHE        | 2.01         | 2.79 | 135.13      | 2938 [O3]  | 944 [O2]      |
|          | 318A    | PHE        | 2.51         | 3.49 | 173.51      | 2926 [O3]  | 944 [O2]      |
|          | 320A    | LYS        | 1.97         | 2.95 | 162.19      | 963 [Nam]  | 2926 [O3]     |
|          | 320A    | LYS        | 2.15         | 3.17 | 174.90      | 972 [N3+]  | 2942 [Nar]    |
|          | 321A    | LEU        | 2.52         | 3.04 | 111.03      | 976 [Nam]  | 2938 [O3]     |
|          | 387A    | ARG        | 2.48         | 3.37 | 145.69      | 1618[Ng+]  | 2942 [Nar]    |
| 25ES     | 320A    | LYS        | 2.03         | 3.04 | 170.07      | 963[Nam]   | 2938[O2]      |
|          | 320A    | LYS        | 1.80         | 2.74 | 152.27      | 972 [N3+]  | 2936[O3]      |
|          | 387A    | ARG        | 3.14         | 3.88 | 130.45      | 1618[Ng+]  | 2936[O3]      |
|          | 466A    | TYR        | 2.19         | 3.16 | 172.80      | 2950[O3]   | 2331[O2]      |
|          | 467A    | ASP        | 2.11         | 3.04 | 158.80      | 2952[O3]   | 2348[O2]      |
|          | 470A    | GLY        | 2.17         | 3.04 | 142.40      | 2370[Nam]  | 2950[O3]      |
| 26ES     | 313A    | PRO        | 1.98         | 2.79 | 139.69      | 2950 [O3]  | 897 [O2]      |
|          | 320A    | LYS        | 2.14         | 3.06 | 148.70      | 963 [Nam]  | 2926[O3]      |
|          | 331A    | ASN        | 2.11         | 3.07 | 155.15      | 1086[Nam]  | 2925 [O3]     |
|          | 387A    | ARG        | 1.75         | 2.76 | 169.20      | 1618[Ng+]  | 2948 [O2]     |
|          | 387A    | ARG        | 2.93         | 3.62 | 125.58      | 1615[Ng+]  | 2948 [O2]     |
|          |         |            |              |      |             |            |               |
| 26MS     | 318A    | PHE        | 2.40         | 3.22 | 140.07      | 2949 [O3]  | 944 [O2]      |
|          | 319A    | ASN        | 2.39         | 3.17 | 137.00      | 2947 [O3]  | 959 [O2]      |
|          | 320A    | LYS        | 1.79         | 2.70 | 147.53      | 963 [Nam]  | 2949 [O3]     |
|          | 467A    | ASP        | 1.97         | 2.76 | 135.60      | 2945 [O3]  | 2348 [O2]     |
| 28MS     | 320A    | LYS        | 2.89         | 3.83 | 154.68      | 972 [N3+]  | 2936 [Nam]    |
|          | 330A    | HIS        | 2.56         | 3.52 | 156.69      | 1065[Nam]  | 2926 [O2]     |
|          | 330A    | HIS        | 1.86         | 2.84 | 159.38      | 1072 [Npl] | 2926 [O2]     |
|          | 335A    | ASN        | 3.03         | 3.99 | 156.51      | 1113[Nam]  | 2935 [O2]     |
|          | 387A    | ARG        | 2.51         | 3.33 | 137.45      | 1618[Ng+]  | 2925 [O2]     |
|          | 387A    | ARG        | 2.11         | 2.97 | 139.97      | 1615[Ng+]  | 2925 [O2]     |
| 30ES     | 320A    | LYS        | 1.78         | 2.75 | 157.80      | 963 [Nam]  | 2939 [O2]     |
|          | 331A    | ASN        | 2.15         | 2.89 | 127.93      | 1086[Nam]  | 2936 [O-]     |
|          | 467A    | ASP        | 1.97         | 2.95 | 175.38      | 2947 [O3]  | 2348 [O2]     |

### 3. Hydrophobic Interactions of Lead Compounds for HK2

| Name | Residue | Amino Acid | Distance | Ligand Atom | Protein Atom |
|------|---------|------------|----------|-------------|--------------|
| 11MS | 67A     | PHE        | 3.35     | 8142        | 500          |
|      | 68A     | VAL        | 3.55     | 8154        | 511          |
|      | 162A    | LYS        | 3.47     | 8149        | 1344         |
|      | 163A    | LEU        | 3.40     | 8152        | 1359         |
|      | 456A    | VAL        | 3.64     | 8153        | 4106         |
|      | 459A    | VAL        | 3.80     | 8156        | 4129         |
|      | 459A    | VAL        | 3.71     | 8155        | 4130         |
| 22MS | 463A    | LEU        | 3.88     | 8153        | 4175         |
|      | 463A    | LEU        | 3.37     | 8141        | 4176         |
|      | 463A    | LEU        | 3.33     | 8154        | 4173         |
| 25ES | 68A     | VAL        | 3.73     | 8132        | 511          |
|      | 455A    | MET        | 3.94     | 8141        | 4096         |
|      | 459A    | VAL        | 3.22     | 8135        | 4129         |
|      | 459A    | VAL        | 3.42     | 8131        | 4130         |
|      | 462A    | ARG        | 3.74     | 8154        | 4157         |
|      | 463A    | LEU        | 3.83     | 8143        | 4175         |
|      | 463A    | LEU        | 3.23     | 8154        | 4176         |
| 26ES | 463A    | LEU        | 3.56     | 8143        | 4176         |
|      | 814A    | ASP        | 3.87     | 8147        | 7248         |
|      | 67A     | PHE        | 3.40     | 8139        | 500          |
| 26MS | 67A     | PHE        | 3.80     | 8135        | 498          |
|      | 162A    | LYS        | 3.23     | 8132        | 1344         |
|      | 163A    | LEU        | 3.52     | 8136        | 1358         |
|      | 463A    | LEU        | 3.99     | 8146        | 4176         |
|      | 463A    | LEU        | 3.05     | 8136        | 4175         |
|      | 817A    | ILE        | 3.48     | 8149        | 7277         |
|      | 67A     | PHE        | 2.85     | 8152        | 502          |
| 28MS | 163A    | LEU        | 3.32     | 8145        | 1359         |
|      | 248A    | VAL        | 4.00     | 8155        | 2155         |
|      | 456A    | VAL        | 3.67     | 8146        | 4106         |
|      | 459A    | VAL        | 3.92     | 8145        | 4128         |
|      | 67A     | PHE        | 3.63     | 8150        | 500          |
| 30ES | 69A     | ARG        | 3.51     | 8143        | 518          |
|      | 459A    | VAL        | 3.01     | 8139        | 4130         |
|      | 463A    | LEU        | 3.31     | 8147        | 4175         |
|      | 67A     | PHE        | 3.63     | 8150        | 500          |

#### 4. Hydrophobic Interactions of Lead Compounds for GLS1

| Name | Residue | Amino Acid | Distance | Ligand Atom | Protein Atom |
|------|---------|------------|----------|-------------|--------------|
| 11MS | 322A    | PHE        | 3.65     | 2943        | 992          |
|      | 330A    | HIS        | 3.00     | 2931        | 1070         |
|      | 334A    | VAL        | 2.94     | 2931        | 1111         |
|      | 335A    | ASN        | 3.87     | 2942        | 1118         |
|      | 336A    | ALA        | 3.08     | 2943        | 1129         |
|      | 391A    | ILE        | 3.01     | 2942        | 1658         |
| 22MS | 322A    | PHE        | 4.00     | 2947        | 992          |
|      | 334A    | VAL        | 3.49     | 2934        | 1111         |
|      | 335A    | ASN        | 3.82     | 2945        | 1118         |
|      | 336A    | ALA        | 3.19     | 2947        | 1129         |
|      | 391A    | ILE        | 3.49     | 2948        | 1658         |
|      | 334A    | VAL        | 3.57     | 2935        | 1110         |
| 25ES | 334A    | VAL        | 3.16     | 2925        | 1111         |
|      | 466A    | TYR        | 3.40     | 2930        | 2334         |
|      | 334A    | VAL        | 3.03     | 2937        | 1111         |
| 26ES | 334A    | VAL        | 3.03     | 2937        | 1111         |
| 26MS | 330A    | HIS        | 3.26     | 2928        | 1070         |
|      | 334A    | VAL        | 3.18     | 2931        | 1111         |
| 28MS | 322A    | PHE        | 3.97     | 2929        | 990          |
|      | 330A    | HIS        | 3.43     | 2950        | 1070         |
|      | 334A    | VAL        | 3.23     | 2950        | 1070         |
|      | 336A    | ALA        | 3.36     | 2929        | 1129         |
|      | 466A    | TYR        | 3.52     | 2943        | 2334         |
| 30ES | 320A    | LYS        | 3.42     | 2946        | 970          |
|      | 334A    | VAL        | 3.52     | 2942        | 1112         |

### 5. Pi Cation Interactions of Lead Compounds for HK2

| Name | Residue | Amino Acid | Distance | Ligand Group | Ligand Atoms                       |
|------|---------|------------|----------|--------------|------------------------------------|
| 22MS | 69A     | ARG        | 4.06     | Aromatic     | 8134, 8135, 8136, 8137, 8138       |
| 26ES | 462A    | ARG        | 3.89     | Aromatic     | 8151, 8152, 8153, 8154, 8155       |
| 30ES | 69A     | ARG        | 4.41     | Aromatic     | 8146, 8147, 8148, 8149, 8150, 8152 |

### 6. Pi Cation Interactions of Lead Compounds for GLS1

| Name | Residue | Amino Acid | Distance | Ligand Group | Ligand Atoms                       |
|------|---------|------------|----------|--------------|------------------------------------|
| 28MS | 320A    | LYS        | 3.77     | Aromatic     | 2944, 2938, 2939, 2940, 2941, 2943 |
|      | 330A    | HIS        | 4.18     | Aromatic     | 2945, 2946, 2947, 2949, 2950, 2951 |

### 7. Salt Bridge Interactions of Lead Compounds for HK2

| Name | Residue | Amino Acid | Distance | Ligand Group | Ligand Atoms |
|------|---------|------------|----------|--------------|--------------|
| 26MS | 467A    | HIS        | 5.07     | Carboxylate  | 8142, 8150   |
|      | 470A    | ARG        | 4.09     | Carboxylate  | 8142, 8150   |

### 8. Salt Bridge Interactions of Lead Compounds for GLS1

| Name | Residue | Amino Acid | Distance | Ligand Group | Ligand Atoms |
|------|---------|------------|----------|--------------|--------------|
| 26ES | 320A    | LYS        | 4.67     |              | 2928, 2926   |
| 26MS | 320A    | LYS        | 3.75     | Carboxylate  | 2944, 2936   |
|      | 387A    | ARG        | 5.08     | Carboxylate  | 2944, 2936   |

### 9. Halogen Interactions of Lead Compounds for GLS1

| Name | Residue | Amino Acid | Distance | Donor Angle | Acceptor Angle | Donor Atom | Acceptor Atom |
|------|---------|------------|----------|-------------|----------------|------------|---------------|
| 28MS | 319A    | ASN        | 3.85     | 166.45      | 122.16         | 2948 [Cl]  | 959 [O2]      |
|      | 508A    | MET        | 3.64     | 146.96      | 138.99         | 2942 [Cl]  | 2696 [O2]     |
