# Supplementary material for: Docking and Molecular Dynamics Study to Identify Novel Phytobiologics from Dracaena trifasciata against Metabolic Reprogramming in Rheumatoid Arthritis
Source: Life (Basel). 2022 Jul 29;12(8):1148. doi: 10.3390/life12081148 (PMC9410489; doi:10.3390/life12081148)
Supplement: Supplementary file 1 [file life-12-01148-s001.zip]

Archive with 4 entries (4 files):
- Supplemental Figures S1-S3.pdf
- Supplemental File S1.xlsx
- Supplemental File S2.pdf
- Supplemental FIle S3.xlsx
