# Supplementary material for: Docking and Molecular Dynamics Study to Identify Novel Phytobiologics from Dracaena trifasciata against Metabolic Reprogramming in Rheumatoid Arthritis
Source: Life (Basel). 2022 Jul 29;12(8):1148. doi: 10.3390/life12081148 (PMC9410489; doi:10.3390/life12081148)
Supplement: Supplementary file 1 [file life-12-01148-s001.zip › Supplemental File S1.xlsx]

## Sheet: Library
		Drug Likeness					Pharmacokinetics							Toxicity
		Lipinski	Ghose	Veber	Egan	Muegge	GI Absorption	BBB Permeant	CYP1A2 Inhibitor	CYP2C19 Inhibitor	CYP2C9 Inhibitor	CYP2D6 Inhibitor	CYP3A4 Inhibitor	AMES Toxicity
Compund Name	SMILE
4,4-Dimethyl-2-pentaNol, chlorodifluoroacetate	CC(CC(C)(C)C)OC(=O)C(F)(F)Cl	Yes	Yes	Yes	Yes	Yes	High	No	No	No	No	No	No	No
1-(4-Pyridin-2-yl-piperazin-1-yl)ethaNone	CC(=O)N1CCN(CC1)C2=CC=CC=N2	Yes	Yes	Yes	Yes	Yes	High	No	No	No	No	No	No	No
Thiazolo[4,5-d]pyrimidine-5,7-diamine, 2-ethylamiNo-	CCNC1=NC2=NC(=NC(=C2S1)N)N	Yes	Yes	Yes	Yes	Yes	High	No	No	No	No	No	No	No
3,6-MethaNo-8H-1,5,7-trioxacyclopenta[ij]cycloprop[a]azulene-4,8(3H)-dione, hexahydro-9-hydroxy-8b-methyl-9-(1-methylethyl)-, [1aR-(1a.alpha.,2a.beta.,3.beta.,6.beta.,6a.beta.,8aS*,8b	CC(C)C1(C2C3CC4C5(C3(C(C1OC2=O)OC5=O)C)O4)O	Yes	Yes	Yes	Yes	Yes	High	No	No	No	No	No	No	No
4-(Hydroxymethyl)-6-[(thiophen-2-yl)carbonyl]-3-oxabicyclo[3.1.0]hexan-2-one	C1=CSC(=C1)C(=O)C2C3C2C(=O)OC3CO	Yes	Yes	Yes	Yes	Yes	High	No	No	No	No	No	No	No
1-(3,4-Methylenedioxybenzylidene)semicarbazide	C1OC2=C(O1)C=C(C=C2)C=NNC(=O)N	Yes	Yes	Yes	Yes	Yes	High	No	No	No	No	No	No	No
Ethyl 2-(2-chloroacetamido)-3,3,3-trifluorolactate	OC(C(F)(F)F)(NC(CCl)=O)C(OCC)=O	Yes	Yes	Yes	Yes	Yes	High	No	No	No	No	No	No	No
Furan-2-carboxylic acid, 5-methyl-4-(4-morpholylmethyl)-	CC1=C(C=C(O1)C(=O)O)CN2CCOCC2	Yes	Yes	Yes	Yes	Yes	High	No	No	No	No	No	No	No
3-[3-(Furan-2-yl)-[1,2,4]triazolo[3,4-b][1,3,4]thiadiazol-6-yl]-1H-pyrazole	C1=COC(=C1)C2=NN=C3N2N=C(S3)C4=CC=NN4	Yes	Yes	Yes	Yes	Yes	High	No	No	Yes	No	No	No	No
Oxirane-2-carboxylic acid, 2-amiNocarbonyl-3-methyl-3-(1-methylethyl)-, ethyl ester	CCOC(=O)C1(C(O1)(C)C(C)C)C(=O)N	Yes	Yes	Yes	Yes	Yes	High	No	No	No	No	No	No	No
Ethyl 2-(2-chloroacetamido)-3,3,3-trifluorolactate	OC(C(F)(F)F)(NC(CCl)=O)C(OCC)=O	Yes	Yes	Yes	Yes	Yes	High	No	No	No	No	No	No	No
Benzenethanamine, 2-fluoro-2',4,5-trihydroxy-N-methyl-	CNCC(C1=CC(=C(C=C1F)O)O)O	Yes	Yes	Yes	Yes	Yes	High	No	No	No	No	No	No	No
Thiamphenicol	CS(=O)(=O)C1=CC=C(C=C1)C(C(CO)NC(=O)C(Cl)Cl)O	Yes	Yes	Yes	Yes	Yes	High	No	No	No	No	No	No	No
Dimethyl-(6-methyl-2-thioxo-[1,3,2]oxathiaphosphinan-2-yl)-amine	CC1CCSP(=S)(O1)N(C)C	Yes	Yes	Yes	Yes	Yes	High	No	No	No	No	No	No	No
Butanedioic acid monoamide, 2-(4-isobutoxyphenyl)-	CC(C)COC1=CC=C(C=C1)C(CC(=O)N)C(=O)O	Yes	Yes	Yes	Yes	Yes	High	No	No	No	No	No	No	No
5-Bromo-N,N-dimethyl-2H-1,2,4-triazole-3-carboxamide	O=C(C1=NC(Br)=NN1)N(C)C	Yes	No	Yes	Yes	Yes	High	No	No	No	No	No	No	No
1-(3,5-Dimethyl-1-adamantaNoyl)semicarbazide	CC12CC3CC(C1)(CC(C3)(C2)C(=O)NNC(=O)N)C	Yes	Yes	Yes	Yes	Yes	High	No	No	No	No	No	No	No
3-Isoxazolecarboxamide, 4,5-dihydro-5-methyl-5-(4-methyl-5-oxo-3-cyclohexenyl)-	CC1=CCC(CC1=O)C2(CC(=No2)C(=O)N)C	Yes	Yes	Yes	Yes	Yes	High	No	No	No	No	No	No	No
Oxirane-2-carboxylic acid, 2-amiNocarbonyl-3-methyl-3-(1-methylethyl)-, ethyl ester	CCOC(=O)C1(C(O1)(C)C(C)C)C(=O)N	Yes	Yes	Yes	Yes	Yes	High	No	No	No	No	No	No	No
1-(2-CyaNo-2-ethyl-butyryl)-3-isopropyl-urea	CCC(CC)(C#N)C(=O)NC(=O)NC(C)C	Yes	Yes	Yes	Yes	Yes	High	No	No	No	No	No	No	No
2-([2-(Butane-1-sulfonyl)ethyl]sulfanyl)ethaNol	CCCCS(=O)(=O)CCSCCO	Yes	Yes	Yes	Yes	Yes	High	No	No	No	No	No	No	No
Ethyl 2-(2-chloroacetamido)-3,3,3-trifluorolactate	OC(C(F)(F)F)(NC(CCl)=O)C(OCC)=O	Yes	Yes	Yes	Yes	Yes	High	No	No	No	No	No	No	No
5,5-Diethyl-2-(methylthio)-4,6(1H,5H)-pyrimidinedione	CCC1(C(=O)NC(=NC1=O)SC)CC	Yes	Yes	Yes	Yes	Yes	High	No	No	No	No	No	No	No
4.alpha.,5.beta.-Epoxy-9.alpha.-hydroxygermacra-1(10),11(13)-dien-6,12-olide 8.alpha.-(4-hydroxysenecioate)	CC1(O2)C2C(OC3=C)C(C3=C)C(OC(/C=C(CO)\C)=O)C(O)/C(C)=C\CC1	Yes	Yes	Yes	Yes	Yes	High	No	No	No	No	No	No	No
Columbin	CC12CCC3C(=O)OC(CC3(C1C4C=CC2(C(=O)O4)O)C)C5=COC=C5	Yes	Yes	Yes	Yes	Yes	High	No	No	No	No	No	No	No
Propanal,3-hexylimiNo-2-nitro-	O=CC(N(=O)=O)/C=N/CCCCCC	Yes	Yes	Yes	Yes	Yes	High	Yes	No	No	No	No	No	No
1-(2-CyaNo-2-ethyl-butyryl)-3-isopropyl-urea	CCC(CC)(C#N)C(=O)NC(=O)NC(C)C	Yes	Yes	Yes	Yes	Yes	High	No	No	No	No	No	No	No
Oxazolidin-2-imine, 5-chloromethyl-3-[4,6-bis(dimethylamiNo)-1,3,5-triazin-2-yl]	CN(C)C1=NC(=NC(=N1)N2CC(OC2=N)CCl)N(C)C	Yes	Yes	Yes	Yes	Yes	High	No	No	No	No	No	No	No
Quinoxaline-2(1H)-one, 5,6,7,8,-tetrahydro-1-hydroxy-3-[2-oxo-2-(4-chlorophenyl)ethyl]-, 4-oxide	O=C(C=1CC(C2=CC=C(Cl)C=C2)=O)N(O)C3=C(CCCC3)N1=O	Yes	Yes	Yes	Yes	Yes	High	No	No	No	No	No	No	No
2-(DimethylamiNo)-1,3-dimethyltetrahydro-1,3,2-diazaphosphole 2-oxide	CN1CCN(P1(=O)N(C)C)C	Yes	Yes	Yes	Yes	No	High	No	No	No	No	No	No
4-(Hydroxymethyl)-6-[(thiophen-2-yl)carbonyl]-3-oxabicyclo[3.1.0]hexan-2-one	C1=CSC(=C1)C(=O)C2C3C2C(=O)OC3CO	Yes	Yes	Yes	Yes	Yes	High	No	No	No	No	No	No	No
1-(3,4-Methylenedioxybenzylidene)semicarbazide	C1OC2=C(O1)C=C(C=C2)C=NNC(=O)N	Yes	Yes	Yes	Yes	Yes	High	No	No	No	No	No	No	No
d-Allo-dec-2-eNonic acid, 5,8-anhydro-2,3,4,9-tetradeoxy-8-C-(hydroxymethyl)-3-methyl-7,8-O-(1-methylethylidene)-, methyl ester, 10-acetate, (E)-	CC(=CC(=O)OC)CC1C(C2C(CO1)(OC(O2)(C)C)CCOC(=O)C)O	Yes	Yes	Yes	Yes	Yes	High	No	No	No	No	No	No	No
2-t-Butyl-4-methyl-5-oxo-[1,3]dioxolane-4-carboxylic acid	CC1(C(=O)OC(O1)C(C)(C)C)C(=O)O	Yes	Yes	Yes	Yes	Yes	High	No	No	No	No	No	No	No
pentaNoic acid, 5-[bis(cyaNomethyl)amiNo]-5-oxo-	C(CC(=O)N(CC#N)CC#N)CC(=O)O	Yes	Yes	Yes	Yes	Yes	High	No	No	No	No	No	No	No
6-AmiNo-2-(3-methylpiperidin-1-yl)-3H-pyrimidin-4-one	CC1CCCN(C1)C2=NC(=CC(=O)N2)N	Yes	Yes	Yes	Yes	Yes	High	No	No	No	No	No	No
5-[4-(Pentyloxy)phenyl]hydantoin	CCCCCOC1=CC=C(C=C1)C2C(=O)NC(=O)N2	Yes	Yes	Yes	Yes	Yes	High	No	No	No	No	No	No	No
1-Hydroxy-4-methoxyimiNomethyl-2,2,5,5-tetramethyl-3-imidazoline-3-oxide	O=N1=C(/C=N/OC)C(C)(C)N(O)C1(C)C	Yes	Yes	Yes	Yes	Yes	High	No	No	No	No	No	No
Carbamic acid, (2-chloroethylidene)bis-, diethyl ester	CCOC(=O)NC(CCl)NC(=O)OCC	Yes	Yes	Yes	Yes	Yes	High	No	No	No	No	No	No	No
1H-1,2,3-Triazole-4-carboxamide, 5-amiNo-1-(4-fluorophenyl)-	C1=CC(=CC=C1N2C(=C(N=N2)C(=O)N)N)F	Yes	Yes	Yes	Yes	Yes	High	No	No	No	No	No	No	No
Diphosphoramide, octamethyl-	CN(C)P(=O)(N(C)C)OP(=O)(N(C)C)N(C)C	Yes	Yes	Yes	Yes	Yes	High	No	No	No	No	No	No	No
Carbromal	NC(NC(C(CC)(Br)CC)=O)=O	Yes	Yes	Yes	Yes	Yes	High	No	No	No	No	No	No	No
Benzeneethanamine, 2,5-difluoro-.beta.,3,4-trihydroxy-N-methyl-	CNCC(C1=CC(=C(C(=C1F)O)O)F)O	Yes	Yes	Yes	Yes	Yes	High	No	No	No	No	No	No	No
Cyclohexa-2,5-diene-1,4-dione, 2-methyl-5-(4-morpholinyl)-	CC1=CC(=O)C(=CC1=O)N2CCOCC2	Yes	Yes	Yes	Yes	Yes	High	No	No	No	No	No	No	No
Butyramide, N-(1,2,4-triazol-5-yl)-2,4-dioxo-4-phenyl-	C1=CC=C(C=C1)C(=O)CC(=O)C(=O)NC2=NC=NN2	Yes	Yes	Yes	Yes	Yes	High	No	No	No	No	No	No	No
4-Pyridinecarbaldehyde 4-ethyl-3-thiosemicarbazone	CCNC(=S)NN=CC1=CC=NC=C1	Yes	Yes	Yes	Yes	Yes	High	No	No	No	No	No	No	No
Tricyclo[5.2.1.0(2,6)]dec-8-ene-3,5-dione, 4-(1,5-dimethyl-3-oxo-2-phenyl-2,3-dihydro-1H-pyrazol-4-yl)-10-oxa-4-aza-	CC1=C(C(=O)N(N1C)C2=CC=CC=C2)N3C(=O)C4C5C=CC(C4C3=O)O5	Yes	Yes	Yes	Yes	Yes	High	No	No	No	No	No	No	No
3-p-Toluenesulfonyl-7-hydroxymethyl-9-hydroxy-3-aza-bicyclo[3.3.1]Nonane	OC1C2CN(S(=O)(C3=CC=C(C)C=C3)=O)CC1CC(CO)C2	Yes	Yes	Yes	Yes	Yes	High	No	No	No	No	No	No	No
4-Pyridinecarbaldehyde 4-ethyl-3-thiosemicarbazone	CCNC(=S)NN=CC1=CC=NC=C1	Yes	Yes	Yes	Yes	Yes	High	No	No	No	No	No	No	No
Hydrastininic acid	CNC(=O)C1=CC2=C(C=C1C(=O)C(=O)O)OCO2	Yes	Yes	Yes	Yes	Yes	High	No	No	No	No	No	No	No
Ethyl 2-(2-chloroacetamido)-3,3,3-trifluorolactate	OC(C(F)(F)F)(NC(CCl)=O)C(OCC)=O	Yes	Yes	Yes	Yes	Yes	High	No	No	No	No	No	No	No
[2,5-Dioxo-1-(m-tolyl)-3-pyrrolidinylthio]acetic acid	CC1=CC(=CC=C1)N2C(=O)CC(C2=O)SCC(=O)O	Yes	Yes	Yes	Yes	Yes	High	No	No	No	No	No	No	No
5,5-Diethyl-2-(methylthio)-4,6(1H,5H)-pyrimidinedione	CCC1(C(=O)NC(=NC1=O)SC)CC	Yes	Yes	Yes	Yes	Yes	High	No	No	No	No	No	No	No
1H-Imidazole-1-ethaNol, .alpha.-methyl-	CC(CN1C=CN=C1)O	Yes	Yes	Yes	Yes	Yes	High	No	No	No	No	No	No	No
Carbamic acid, (2-chloroethylidene)bis-, diethyl ester	CCOC(=O)NC(CCl)NC(=O)OCC	Yes	Yes	Yes	Yes	Yes	High	No	No	No	No	No	No	No
Furan-2-carboxylic acid, 5-carboxymethylthiomethyl-	C1=C(OC(=C1)C(=O)O)CSCC(=O)O	Yes	Yes	Yes	Yes	Yes	High	No	No	No	No	No	No	No
Ethyl 2-(2-chloroacetamido)-3,3,3-trifluorolactate	OC(C(F)(F)F)(NC(CCl)=O)C(OCC)=O	Yes	Yes	Yes	Yes	Yes	High	No	No	No	No	No	No	No
Ethane-1,2-diol, 1,2-bis(1-benzotriazolyl)-	C1=CC=C2C(=C1)N=NN2C(C(N3C4=CC=CC=C4N=N3)O)O	Yes	Yes	Yes	Yes	Yes	High	No	No	No	No	No	No	No
1-(3,5-Dimethyl-1-adamantaNoyl)semicarbazide	CC12CC3CC(C1)(CC(C3)(C2)C(=O)NNC(=O)N)C	Yes	Yes	Yes	Yes	Yes	High	No	No	No	No	No	No	No
Benzenethanamine, 2-fluoro-2',4,5-trihydroxy-N-methyl-	CNCC(C1=CC(=C(C=C1F)O)O)O	Yes	Yes	Yes	Yes	Yes	High	No	No	No	No	No	No	No
2-Methylpiperidine-1-thiocarboxylic acid 2-[1-[2-pyridyl 1-oxide]	CC1CCCCN1C(N/N=C(C2=N(C=CC=C2)=O)\C)=S	Yes	Yes	Yes	Yes	Yes	High	No	No	No	No	No	No	No
Oxacyclooctadec-3-en-2-one, 5,6,7-trihydroxy-18-methyl-	OC(CCCCCCCCCCC(C)O1)C(O)C(O)/C=C\C1=O	Yes	Yes	Yes	Yes	Yes	High	No	No	No	No	No	No	No
5-Ethyl-2-formylpyridine thiosemicarbazone	CCC1=CN=C(C=C1)C=NNC(=S)N	Yes	Yes	Yes	Yes	Yes	High	No	No	No	No	No	No	No
N-(4-Chlorophenyl)-2-[1-(3-chlorophenyl)-2,5-dioxo-3-pyrrolidinylthio]acetamide	C1C(C(=O)N(C1=O)C2=CC(=CC=C2)Cl)SCC(=O)NC3=CC=C(C=C3)Cl	Yes	Yes	Yes	Yes	Yes	High	No	No	No	No	No	No	No
3-Ethyl-5-(4-nitro-1H-pyrazol-1-yl)-4H-1,2,4-triazol-4-amine	NN1C(CC)=NN=C1N2N=CC(N(=O)=O)=C2	Yes	Yes	Yes	Yes	Yes	High	No	No	No	No	No	No	Yes
1-(2-CyaNo-2-ethyl-butyryl)-3-isopropyl-urea	CCC(CC)(C#N)C(=O)NC(=O)NC(C)C	Yes	Yes	Yes	Yes	Yes	High	No	No	No	No	No	No	No
Benzylamine, 2-hydroxy-N,N-di-[2-amiNoethyl]-	C1=CC=C(C(=C1)CN(CCN)CCN)O	Yes	Yes	Yes	Yes	Yes	High	No	No	No	No	No	No	No
5-[4-(Pentyloxy)phenyl]hydantoin	CCCCCOC1=CC=C(C=C1)C2C(=O)NC(=O)N2	Yes	Yes	Yes	Yes	Yes	High	No	No	No	No	No	No	No
2-QuiNoxalineacetic acid, 1-[(ethylamiNo)carbonyl]decahydro-3-oxo-, ethyl ester	CCNC(=O)N1C2CCCCC2NC(=O)C1CC(=O)OCC	Yes	Yes	Yes	Yes	Yes	High	No	No	No	No	No	No	No
Piperidine, 1-[(3-oxo-1-azabicyclo[2.2.2]oct-2-yl)carbonyl]-	O=C(N1CCCCC1)C2N(CC3)CCC3C2=O	Yes	Yes	Yes	Yes	Yes	High	No	No	No	No	No	No	No
3-pyridinamine, 2-[(1-methyl-1H-tetrazol-5-yl)thio]-	CN1C(=NN=N1)SC2=C(C=CC=N2)N	Yes	Yes	Yes	Yes	Yes	High	No	No	No	No	No	No	No
Carbamate, N-[2-(4-amiNo-2-oxo-1,2-dihydro-1-pyrimidinyl)-1-cyaNoethyl]-, (1,1-dimethylethyl)ester	CC(C)(C)OC(=O)NC(CN1C=CC(=NC1=O)N)C#N	Yes	Yes	Yes	Yes	Yes	High	No	No	No	No	No	No	No
Purine-2,6-dione, 8-(3-ethoxypropylamiNo)-1,3-dimethyl-3,9-dihydro-	CCOCCCNC1=NC2=C(N1)C(=O)N(C(=O)N2C)C	Yes	Yes	Yes	Yes	Yes	High	No	No	No	No	No	No	No
Purin-2,6-dione, 8-[5-hydroxypentyl]-1,3-dimethyl-	CN1C2=C(C(=O)N(C1=O)C)NC(=N2)CCCCCO	Yes	Yes	Yes	Yes	Yes	High	No	No	No	No	No	No	No
Purine-2,6-dione, 8-(3-ethoxypropylamiNo)-1,3-dimethyl-3,9-dihydro-	CCOCCCNC1=NC2=C(N1)C(=O)N(C(=O)N2C)C	Yes	Yes	Yes	Yes	Yes	High	No	No	No	No	No	No	No
3-(Bromomethyl)-2,2-dimethyl-4-nitrobutaNoic acid, methyl ester	O=C(OC)C(C)(C)C(CBr)CN(=O)=O	Yes	Yes	Yes	Yes	Yes	High	Yes	No	No	No	No	No	No
1H-Purine-2,6-dione, 1,3-diethyl-3,9-dihydro-9-methyl-	CCN1C2=C(C(=O)N(C1=O)CC)N=CN2C	Yes	Yes	Yes	Yes	Yes	High	No	No	No	No	No	No
