# Supplementary material for: Docking and Molecular Dynamics Study to Identify Novel Phytobiologics from Dracaena trifasciata against Metabolic Reprogramming in Rheumatoid Arthritis
Source: Life (Basel). 2022 Jul 29;12(8):1148. doi: 10.3390/life12081148 (PMC9410489; doi:10.3390/life12081148)
Supplement: Supplementary file 1 [file life-12-01148-s001.zip › Supplemental FIle S3.xlsx]

## Sheet: Lead Compounds
Compound	Name of the Compound	Retention Time	2D Formula	Molecular Formula	Molecular Weight
11MS	Tricyclo[5.2.1.0(2,6)]dec-8-ene-3,5-dione, 4-(1,5-dimethyl-3-oxo-2-phenyl-2,3-dihydro-1H-pyrazol-4-yl)-10-oxa-4-aza-	17.962		C19H17N3O4	351
22MS	Ethane-1,2-diol, 1,2-bis(1-benzotriazolyl)-	37.433		C14H12N6O2	296
25ES	4.alpha.,5 beta.-Epoxy-9.alpha.-hydroxygermacra-1(10),11(13)-dien-6,12-olide 8.alpha.-(4-hydroxysenecioate)	37.025		C20H26O7	378
26ES	Columbin	39.8		C20H22O6	358
26MS	Oxacyclooctadec-3-en-2-one, 5,6,7-trihydroxy-18-methyl-	40.645		C18H32O5	328
28MS	N-(4-Chlorophenyl)-2-[1-(3-chlorophenyl)-2,5-dioxo-3-pyrrolidinylthio]acetamide	42.26		C18H14Cl2N2O3S	408
30ES	Quinoxaline-2(1H)-one, 5,6,7,8,-tetrahydro-1-hydroxy-3-[2-oxo-2-(4-chlorophenyl)ethyl]-, 4-oxide	43.68		C16H15ClN2O4	334
